# Supplementary material for: Inducible and reversible regulation of endogenous gene in mouse
Source: PubMed Central journal article supplement — Nucleic Acids Res. 2012 Aug 8;40(21):e166. doi: 10.1093/nar/gks738 (PMC3505985; doi:10.1093/nar/gks738), 2012-08-08
Supplement: supp_gks738_nar-00492-met-g-2012-File010.pdf [file supp_gks738_nar-00492-met-g-2012-File010.pdf]

## Supplementary Figure 1

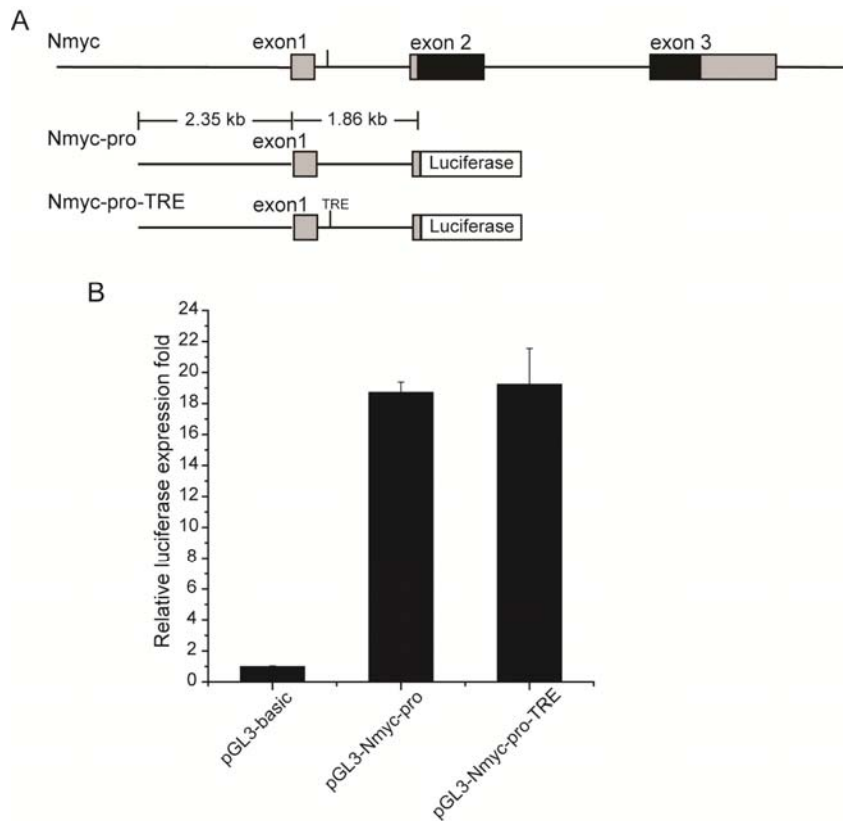

Transient transfection assay define the effect of TRE insertion to normal expression of Nmyc promoter. A: The structure of Nmyc gene, pGL3-Nmyc-pro plasmid and pGL3-Nmyc-pro-TRE plasmid. B: Plasmid of pGL3-basic, pGL3-Nmyc-pro and pGL3-Nmyc-pro-TRE were transfected into Neuro-2a cell. Luciferase activity was normalized to Renilla luciferase activity encoded by cotransfected control plasmid pRL-SV40 and then normalized to the pGL3-basic plasmid.

## Supplementary Figure 2

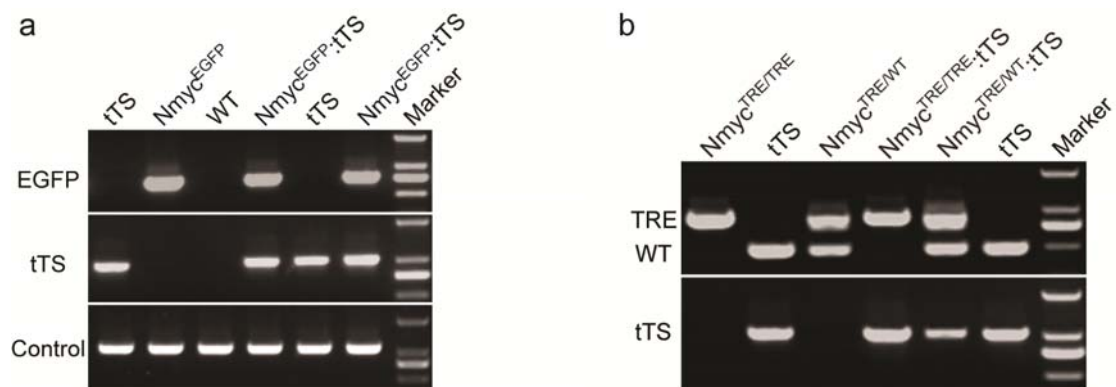

PCR confirmed mouse genotypes. (a) The expected size of PCR products were 782 bp for Nmyc<sup>EGFP</sup> and 1027 bp for tTS. A 1051 bp product was the positive control. (b) The expected size of PCR products were 880 bp for the Nmyc<sup>TRE</sup>, 495 bp for the wild type Nmyc, and 1027 bp for tTS.

### Supplementary Figure 3

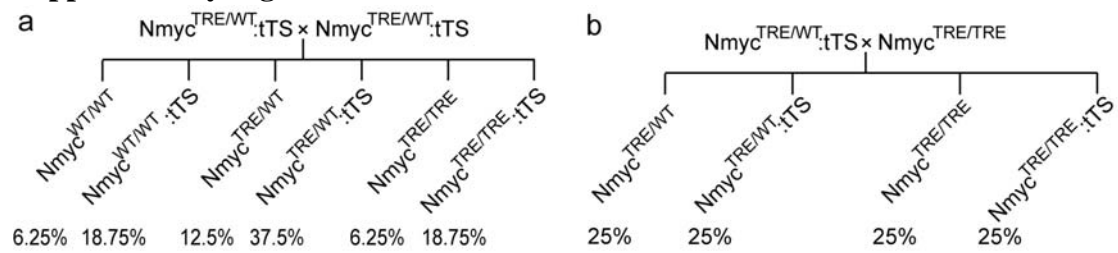

Expected genotypic frequencies in the progeny of (a) a cross between  $Nmyc^{TRE/WT};tTS$  individuals and (b) a cross between  $Nmyc^{TRE/WT};tTS$  and  $Nmyc^{TRE/TRE}$  mice.

### Supplementary Figure 4

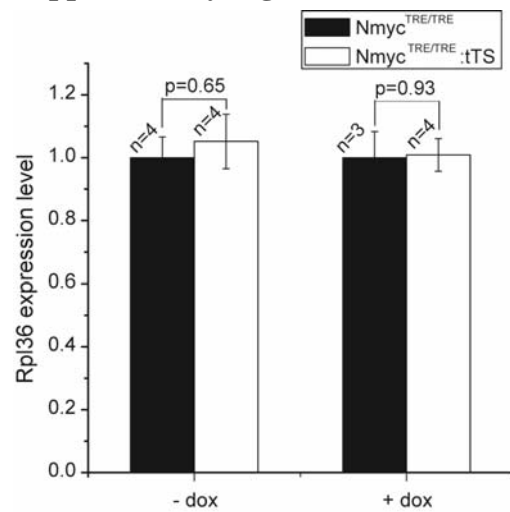

Quantitative real-time PCR of Rpl36 expression level in  $Nmyc^{TRE/TRE}$  and  $Nmyc^{TRE/TRE};tTS$  E10.5d embryos. Pregnant mice were reared on drinking water containing 0 mg/ml dox (-dox) or 2mg/ml dox (+dox) since E0.5d.

### Supplementary Material and Methods

*Primer information described in our experiments.*

| Primer           | Sequence (5'-3')            | Fragment size (bp)                             |
|------------------|-----------------------------|------------------------------------------------|
| Primer I         | ATTGGGTCTTAAGATGTGAACAAAGTC | $Nmyc^{EGFP}$ allele: 3528;<br>wt allele: 3144 |
| Primer II        | TTTCTTTTCGCTAAAGCTATTTCTCTG |                                                |
| Primer III       | CCTCCCCCGTGCCCTTCCTTGAC     | $Nmyc^{EGFP}$ allele: 5408                     |
| Primer IV        | GATGTTTCGCGATTGTCTCGGAAGC   |                                                |
| tTS-F            | TCGACGCCTTAGCCATTGAGAT      | tTS(+) allele: 1027                            |
| tTS-R            | GCGATGCAATTTCCCTCATT        |                                                |
| Primer V         | GTTGGCGGACTCTGCTGCTCTCC     | $Nmyc^{EGFP}$ allele: 782                      |
| Primer VI        | CGGCGGCGGTCACGAACCTCC       |                                                |
| Genome-control-F | AATCGGTGCAACACGTTGCTCTCG    | 1051                                           |
| Genome-control-R | TGGCAGTACTCGCATGTAATCCTA    |                                                |
| Primer VII       | CCGCCCGCTCCCTCAG            | $Nmyc^{TRE}$ allele: 880;                      |

|             |                            |                    |
|-------------|----------------------------|--------------------|
| Primer VIII | GCTTCGCCTAACCCCTTTTCCTTCTT | WT allele: 495     |
| Cre-F       | GCGCGGTCTGGCAGTAAAAAC      | Cre(+) allele: 779 |
| Cre-R       | TCAGCAGGCGCACCATG          |                    |

*Cell culture, transfection, and reporter gene assays.*

Neuro 2a (mouse neuroblastoma) cell lines were grown in DMEM (Hyclone) with 10% fetal calf serum supplemented with 100 units/ml penicillin and 100 mg/ml streptomycin (Invitrogen). Cells were transfected in Opti-MEM (Invitrogen) with Lipofectamine 2000 (Invitrogen). Cells were harvested 48 hours post-transfection and assayed for reporter gene activity with Dual-luciferase Reporter Assay System (Promega).
